# Supplementary material for: Synthesis and crystal structure of three new cadmium tartrates with open frameworks
Source: Royal Society of Chemistry journal article supplement (doi:10.1039/c2ce26312b), 2012-01-01
Supplement: c2ce26312b.pdf [file c2ce26312b.pdf]

## Electronic Supplementary Material

### Synthesis and crystal structure of three new cadmium tartrates with open frameworks

Paula Vera-Cruz,<sup>a</sup> Rubén A. Toscano,<sup>b</sup> Jorge Balmaseda,<sup>\*a</sup> Mario Basterrechea,<sup>c,d</sup>  
Netzahualcoyotl Niño<sup>a</sup> and Luis Felipe del Castillo<sup>\*a</sup>

**Figure S1.** Powder X-ray diffraction pattern of compound **I** pure.

**Figure S2.** Powder X-ray diffraction pattern of sample containing compound **II** as a predominant phase with lower contributions of compounds **I** and **III**.

**Figure S3.** Powder X-ray diffraction pattern of sample containing compound **III** as a predominant phase with a lower contribution of compound **IV**.

**Figure S4.** Powder X-ray diffraction pattern of compound **IV** pure.

**Table S1.** Selected bond lengths (Å) and angles (°) for compounds **I**, **II** and **III**.

**Table S2.** Selected hydrogen bond distances (Å) and angles (°) for compounds **I**, **II** and **III**.

**Figure S5.** Topological Analysis for Compound **I**.

**Figure S6.** Topological Analysis for Compound **IV**.

**Table S3.** Topologies of reported cadmium tartrates

**Table S1.** Selected bond lengths (Å) and angles (°) for compounds **I**<sup>a</sup>, **II**<sup>b</sup> and **III**<sup>c</sup>

|           |                                        |           |                                            |            |
|-----------|----------------------------------------|-----------|--------------------------------------------|------------|
| <b>I</b>  | Cd1—O6 <sup>i</sup>                    | 2.276(3)  | Cd2—O11 <sup>iii</sup>                     | 2.302(3)   |
|           | Cd1—O7                                 | 2.298(3)  | Cd2—O15                                    | 2.334(3)   |
|           | Cd1—O12 <sup>i</sup>                   | 2.323(3)  | Cd3—O8                                     | 2.203(3)   |
|           | Cd1—O1                                 | 2.371(3)  | Cd3—O17                                    | 2.235(3)   |
|           | Cd1—O4 <sup>i</sup>                    | 2.446(3)  | Cd3—O16 <sup>i</sup>                       | 2.357(3)   |
|           | Cd1—O9                                 | 2.476(3)  | Cd3—O19                                    | 2.371(3)   |
|           | Cd1—O10 <sup>i</sup>                   | 2.562(3)  | Cd3—O1 <sup>iv</sup>                       | 2.404(3)   |
|           | Cd1—O3                                 | 2.599(3)  | Cd3—O2 <sup>iv</sup>                       | 2.446(3)   |
|           | Cd2—O5                                 | 2.248(3)  | Cd1...Cd2 <sup>viii</sup>                  | 4.7722(4)  |
|           | Cd2—O14 <sup>ii</sup>                  | 2.285(3)  | Cd1...Cd3 <sup>v</sup>                     | 4.4791(4)  |
|           | Cd2—O13                                | 2.286(3)  | O12 <sup>iii</sup> —Cd2—O15                | 178.43(9)  |
|           | O6 <sup>i</sup> —Cd1—O4 <sup>i</sup>   | 69.09(9)  | O11 <sup>iii</sup> —Cd2—O12 <sup>iii</sup> | 52.83(9)   |
|           | O7—Cd1—O9                              | 69.07(8)  | O8—Cd3—O17                                 | 111.14(11) |
|           | O12 <sup>i</sup> —Cd1—O10 <sup>i</sup> | 67.02(8)  | O17—Cd3—O1 <sup>iv</sup>                   | 82.75(10)  |
|           | O1—Cd1—O3                              | 65.18(8)  | O8—Cd3—O2 <sup>iv</sup>                    | 111.54(10) |
|           | O5—Cd2—O14 <sup>ii</sup>               | 92.07(10) | O1 <sup>iv</sup> —Cd3—O2 <sup>iv</sup>     | 53.89(9)   |
|           | O14 <sup>ii</sup> —Cd2—O13             | 105.0(1)  | O16 <sup>i</sup> —Cd3—O19                  | 172.31(12) |
|           | O5—Cd2—O11 <sup>iii</sup>              | 90.20(11) | Cd1 <sup>vi</sup> —O12—Cd2 <sup>vii</sup>  | 146.31(12) |
|           | O13—Cd2—O11 <sup>iii</sup>             | 91.31(10) | Cd1—O1—Cd3 <sup>v</sup>                    | 139.41(11) |
|           | O13—Cd2—O15                            | 70.15(9)  |                                            |            |
| <b>II</b> | Cd1—O11                                | 2.286(6)  | Cd3—O2                                     | 2.203(6)   |
|           | Cd1—O10 <sup>i</sup>                   | 2.296(6)  | Cd3—O12 <sup>ii</sup>                      | 2.208(6)   |
|           | Cd1—O10                                | 2.365(6)  | Cd3—O6 <sup>iii</sup>                      | 2.245(6)   |
|           | Cd1—O1                                 | 2.379(6)  | Cd3—O8 <sup>i</sup>                        | 2.318(6)   |
|           | Cd1—O4                                 | 2.386(5)  | Cd3—O7 <sup>i</sup>                        | 2.489(5)   |
|           | Cd1—O3                                 | 2.395(6)  | Cd3—O5 <sup>iii</sup>                      | 2.604(6)   |
|           | Cd1—O13                                | 2.410(6)  | Cd3—C5 <sup>i</sup>                        | 2.735(7)   |
|           | Cd2—O4                                 | 2.275(6)  | Cd1...Cd2                                  | 3.5495(8)  |
|           | Cd2—O14                                | 2.295(7)  | Cd1...Cd1 <sup>i</sup>                     | 3.6237(9)  |
|           | Cd2—O7                                 | 2.321(6)  | Cd1...Cd2 <sup>i</sup>                     | 3.5260(8)  |
|           | Cd2—O4 <sup>i</sup>                    | 2.324(6)  | Cd2...Cd2 <sup>i</sup>                     | 3.5257(8)  |
|           | Cd2—O5                                 | 2.327(6)  | Cd2...Cd3 <sup>iii</sup>                   | 4.8372(9)  |
|           | Cd2—O10                                | 2.371(5)  | Cd2...Cd3 <sup>i</sup>                     | 4.5594(9)  |
|           | Cd2—O9                                 | 2.572(6)  | O4 <sup>i</sup> —Cd2—O10                   | 81.16(19)  |
|           | O11—Cd1—O10                            | 72.02(19) | O7—Cd2—O9                                  | 66.6(2)    |
|           | O10 <sup>i</sup> —Cd1—O10              | 77.6(2)   | O10—Cd2—O9                                 | 66.51(19)  |
|           | O10 <sup>i</sup> —Cd1—O4               | 81.41(19) | O4 <sup>i</sup> —O4—O10                    | 61.27(19)  |
|           | O10—Cd1—O4                             | 79.83(18) | O4 <sup>i</sup> —O10—O4                    | 57.67(18)  |
|           | O1—Cd1—O4                              | 80.0(2)   | O4 <sup>i</sup> —O4—O10 <sup>i</sup>       | 61.07(19)  |
|           | O1—Cd1—O3                              | 69.2(2)   | O5—O9—O14                                  | 43.67(16)  |
|           | O4—Cd1—O3                              | 68.72(19) | O5—O14—O9                                  | 43.56(16)  |
|           | O4—O10—O10 <sup>i</sup>                | 61.47(18) | O9—O5—O14                                  | 92.77(23)  |
|           | O10 <sup>i</sup> —O4—O10               | 57.26(17) | O8 <sup>i</sup> —Cd3—O7 <sup>i</sup>       | 54.71(19)  |
|           | O10 <sup>i</sup> —O10—O4 <sup>i</sup>  | 61.27(18) | O6 <sup>iii</sup> —Cd3—O5 <sup>iii</sup>   | 53.4(2)    |
|           | O11—O3—O13                             | 43.33(16) | O6 <sup>ix</sup> —O8—O7                    | 70.30(24)  |
|           | O11—O13—O3                             | 52.37(19) | O8 <sup>viii</sup> —O6—O7 <sup>viii</sup>  | 39.84(17)  |
|           | O3—O11—O13                             | 84.30(24) | O6 <sup>ix</sup> —O7—O8                    | 69.86(24)  |
|           | O4—Cd2—O4 <sup>i</sup>                 | 79.61(19) | O5 <sup>iii</sup> —O2—O12 <sup>ii</sup>    | 63.84(20)  |

|            |                          |            |                                         |            |
|------------|--------------------------|------------|-----------------------------------------|------------|
|            | O4—Cd2—O5                | 73.4(2)    | O2 <sup>v</sup> —O12—O5 <sup>vi</sup>   | 61.97(19)  |
|            | O4—Cd2—O10               | 81.97(19)  | O2 <sup>iv</sup> —O5—O12 <sup>vii</sup> | 54.20(18)  |
|            | O7—Cd2—O10               | 84.4(2)    |                                         |            |
| <b>III</b> | Cd1—O11                  | 2.212(3)   | Cd2—O1                                  | 2.229(2)   |
|            | Cd1—O2 <sup>i</sup>      | 2.233(3)   | Cd2—O13                                 | 2.233(3)   |
|            | Cd1—O5                   | 2.241(3)   | Cd2—O7                                  | 2.299(3)   |
|            | Cd1—O8 <sup>ii</sup>     | 2.249(3)   | Cd2—O9                                  | 2.312(3)   |
|            | Cd1—O10                  | 2.411(3)   | Cd2—O3                                  | 2.360(3)   |
|            | Cd1—O4                   | 2.442(3)   | Cd1...Cd2                               | 5.776(1)   |
|            | Cd2—O6 <sup>iii</sup>    | 2.179(2)   | O6 <sup>iii</sup> —Cd2—O1               | 114.00(11) |
|            | O11—Cd1—O2 <sup>i</sup>  | 90.58(11)  | O6 <sup>iii</sup> —Cd2—O7               | 87.29(10)  |
|            | O2 <sup>i</sup> —Cd1—O5  | 102.23(12) | O1—Cd2—O9                               | 89.4(1)    |
|            | O11—Cd1—O10              | 71.55(9)   | O7—Cd2—O9                               | 69.82(9)   |
|            | O5—Cd1—O10               | 92.43(10)  | O1—Cd2—O3                               | 71.59(10)  |
|            | O5—Cd1—O4                | 70.47(9)   | O13—Cd2—O3                              | 164.83(11) |
|            | O8 <sup>ii</sup> —Cd1—O4 | 158.29(10) |                                         |            |

<sup>a</sup> Symmetry codes: (i)  $-1+x, y, z$ ; (ii)  $-0.5+x, 0.5-y, 1-z$ ; (iii)  $2-x, -0.5+y, 0.5-z$ ; (iv)  $0.5-x, 1-y, 0.5+z$ ; (v)  $0.5-x, 1-y, -0.5+z$ ; (vi)  $1+x, y, z$ ; (vii)  $2-x, 0.5+y, 0.5-z$ ; (viii)  $1-x, 0.5+y, 0.5-z$ .

<sup>b</sup> Symmetry codes: (i)  $-x, 1-y, z$ ; (ii)  $0.5-x, -0.5+y, 1-z$ ; (iii)  $0.5-x, -0.5+y, -z$ ; (iv)  $0.5-x, 0.5+y, -z$ ; (v)  $0.5-x, 0.5+y, 1-z$ ; (vi)  $x, y, 1+z$ ; (vii)  $x, y, -1+z$ ; (viii)  $0.5+x, 1.5-y, -z$ ; (ix)  $-0.5+x, 1.5-y, -z$ .

<sup>c</sup> Symmetry codes: (i)  $1-x, 0.5+y, 1-z$ ; (ii)  $-x, 0.5+y, -z$ ; (iii)  $-x, -0.5+y, 1-z$ .

---

**Table S2.** Selected hydrogen bond distances (Å) and angles (°) for compounds **I**<sup>a</sup>, **II**<sup>b</sup> and **III**<sup>c</sup>

|                              | <b>D-H...A</b>                | <b>d(D-H)</b>            | <b>d(H...A)</b> | <b>d(D...A)</b> | <b>&lt;DHA</b> |
|------------------------------|-------------------------------|--------------------------|-----------------|-----------------|----------------|
| <b>I</b>                     | O4—H4...O9                    | 0.847(10)                | 2.64(2)         | 3.435(4)        | 157.0(4)       |
|                              | O10—H10A...O18                | 0.845(10)                | 1.918(18)       | 2.733(5)        | 162.0(5)       |
|                              | O15—H15...O20                 | 0.85(1)                  | 1.828(15)       | 2.664(4)        | 167.0(5)       |
|                              | O16—H16...O7 <sup>i</sup>     | 0.844(10)                | 2.15(4)         | 2.816(4)        | 136.0(4)       |
|                              | O19—H19B...O18                | 0.851(10)                | 2.51(4)         | 3.184(5)        | 137.0(5)       |
|                              | O20—H20A...O11 <sup>ii</sup>  | 0.8500                   | 2.5000          | 3.258(5)        | 147.900        |
|                              | O20—H20B...O16 <sup>iii</sup> | 0.8500                   | 2.3700          | 3.024(4)        | 133.600        |
| <b>II</b>                    | O3—H3A...O16                  | 0.8500(14)               | 1.789(14)       | 2.636(9)        | 174.0(11)      |
|                              | O13—H13B...O15                | 0.8500(15)               | 2.05(5)         | 2.811(9)        | 149.0(9)       |
|                              | O14—H14A...O19 <sup>i</sup>   | 0.8500(14)               | 1.931(11)       | 2.78(1)         | 178.0(12)      |
|                              | O16—H16B...O15                | 0.8500(14)               | 1.98(4)         | 2.808(12)       | 163.0(13)      |
|                              | O17—H17A...O2 <sup>ii</sup>   | 0.8500(14)               | 1.877(15)       | 2.701(9)        | 163.0(4)       |
|                              | O17—H17B...O19 <sup>ii</sup>  | 0.8500(15)               | 2.41(6)         | 3.065(10)       | 134.0(7)       |
|                              | O18—H18A...O9 <sup>iii</sup>  | 0.8500(14)               | 2.065(19)       | 2.906(9)        | 171.0(10)      |
|                              | O18—H18B...O8 <sup>iv</sup>   | 0.8500(14)               | 2.01(5)         | 2.803(9)        | 154.0(10)      |
|                              | O19—H19A...O12 <sup>iv</sup>  | 0.8500(14)               | 2.15(6)         | 2.920(9)        | 150.0(11)      |
|                              | O19—H19B...O18                | 0.8500(14)               | 2.10(4)         | 2.897(10)       | 157.0(10)      |
|                              | O20—H20A...O13                | 0.8500(14)               | 2.09(3)         | 2.904(7)        | 161.0(7)       |
|                              | <b>III</b>                    | O3—H3A...O5 <sup>i</sup> | 0.775(18)       | 2.49(3)         | 3.223(4)       |
| O4—H4...O3                   |                               | 0.776(18)                | 2.47(3)         | 2.832(4)        | 110.3(19)      |
| O9—H9...O15                  |                               | 0.773(18)                | 1.82(2)         | 2.584(4)        | 171.0(5)       |
| O13—H13A...O12 <sup>ii</sup> |                               | 0.770(18)                | 1.88(3)         | 2.619(4)        | 161.0(7)       |
| O14—H14A...O2                |                               | 0.775(18)                | 2.53(5)         | 3.260(7)        | 157.0(9)       |
| O14—H14B...O4                |                               | 0.775(18)                | 2.41(6)         | 3.059(6)        | 142.0(9)       |
| O15—H15B...O14               |                               | 0.772(18)                | 2.18(4)         | 2.893(10)       | 153.0(8)       |
| O16—H16A...O14               |                               | 0.773(18)                | 2.34(9)         | 2.808(9)        | 120.0(9)       |
| O16—H16B...O11               |                               | 0.774(18)                | 2.00(3)         | 2.762(5)        | 166.0(10)      |

<sup>a</sup> Symmetry codes: (i) 1+x, y, z; (ii) 1-x, -0.5+y, 0.5-z; (iii) -1+x, y, z.

<sup>b</sup> Symmetry codes: (i) 0.5-x, 0.5+y, -z; (ii) x, y, 1+z; (iii) 1-x, 1-y, z; (iv) 0.5-x, -0.5+y, 1-z.

<sup>c</sup> Symmetry codes: (i) -x, -0.5+y, 1-z; (ii) 1-x, -0.5+y, -z.

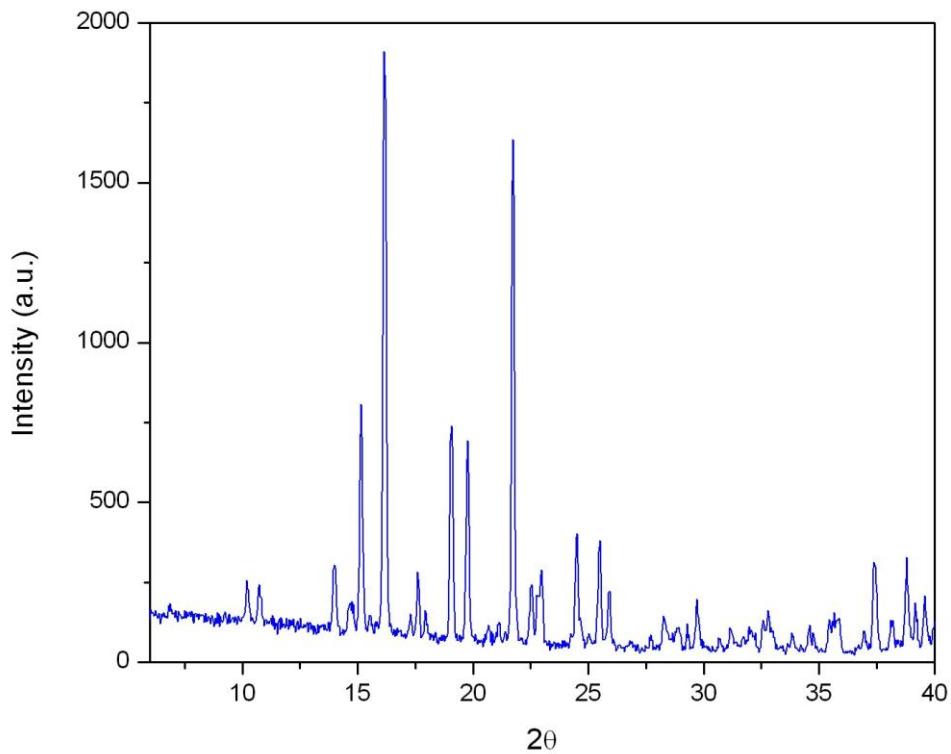

**Figure S1.** Powder X-ray diffraction pattern of compound **I** pure.

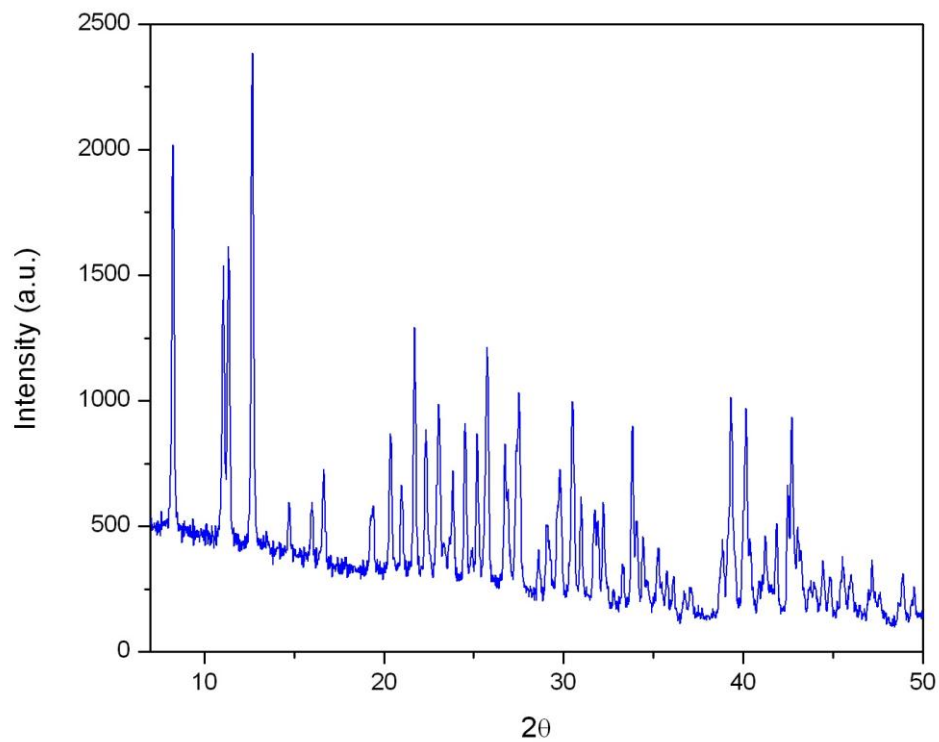

**Figure S2.** Powder X-ray diffraction pattern of sample containing compound **II** as a predominant phase with lower contributions of compounds **I** and **III**.

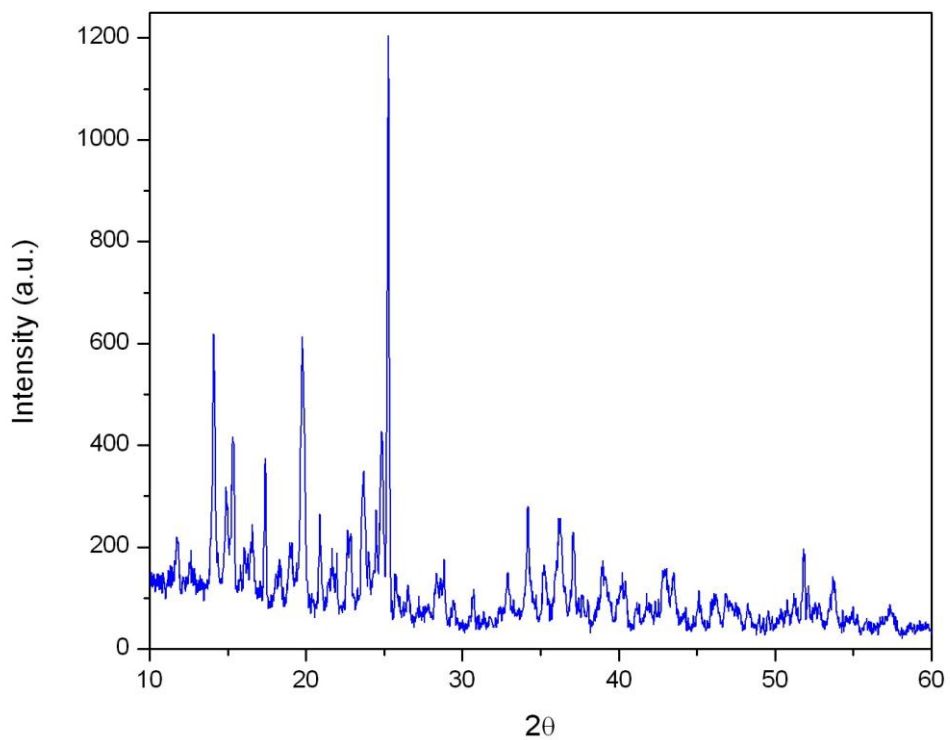

**Figure S3.** Powder X-ray diffraction pattern of sample containing compound **III** as a predominant phase with a lower contribution of compound **IV**.

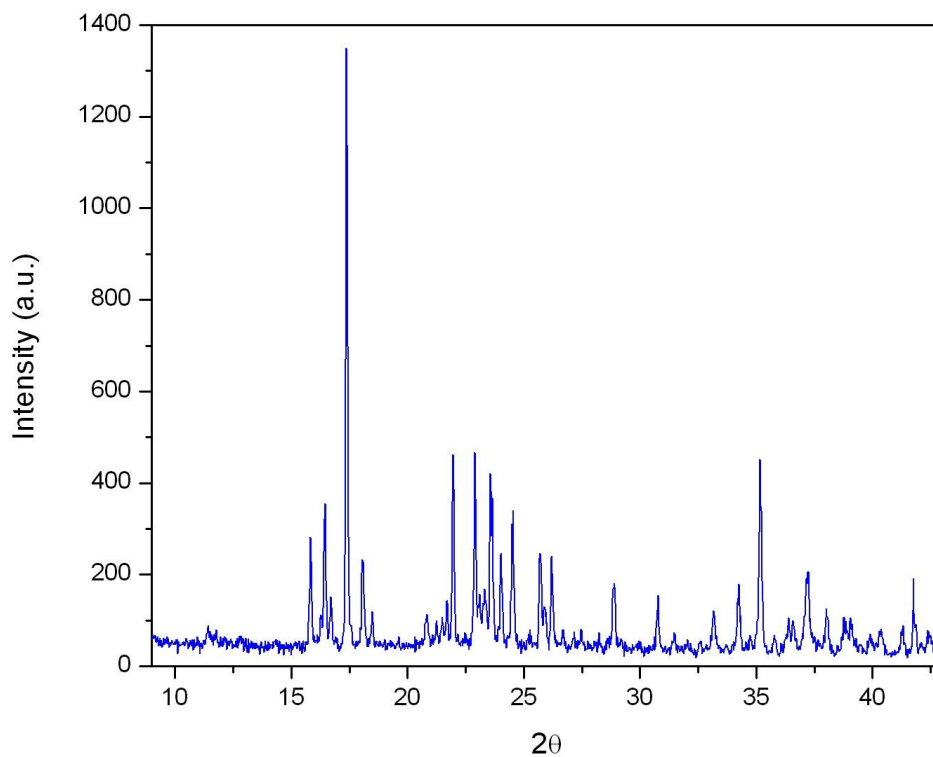

**Figure S4.** Powder X-ray diffraction pattern of compound **IV** pure.

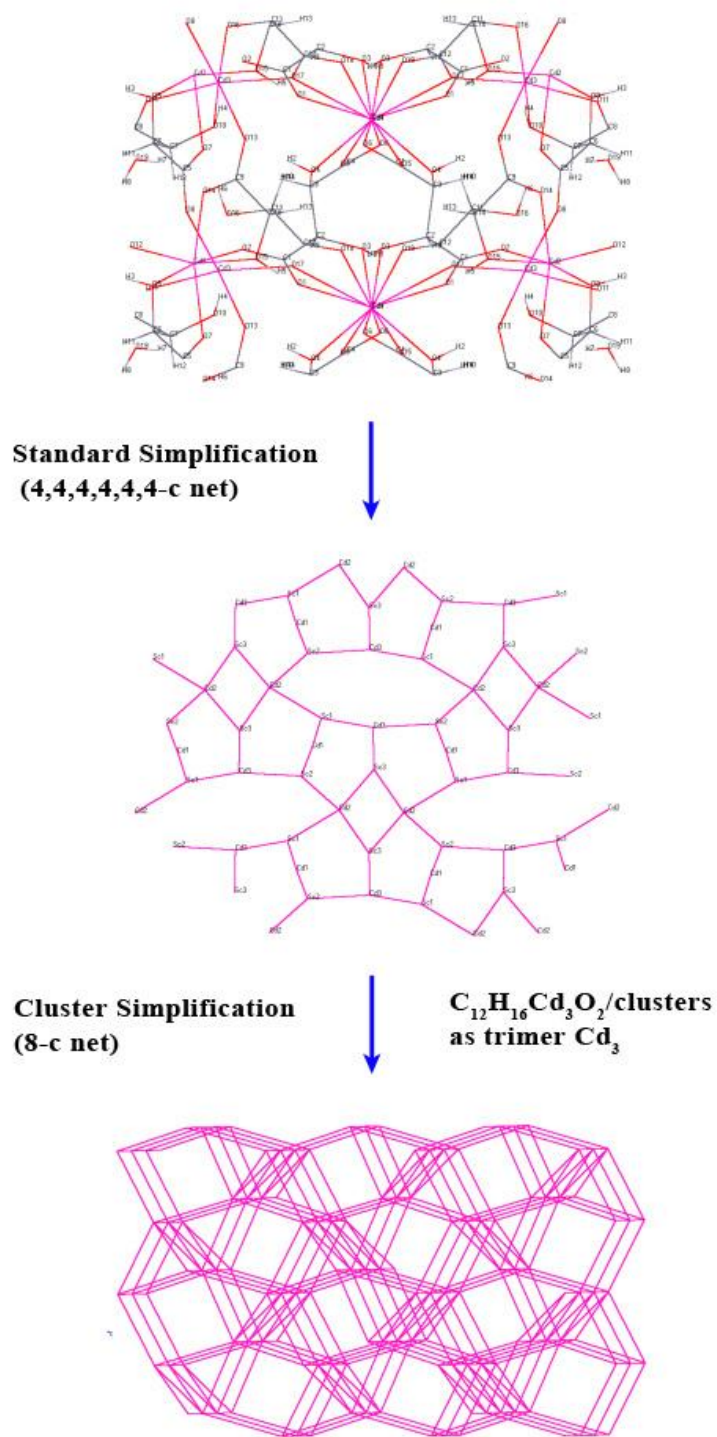

**Figure S5.** Topological Analysis for Compound I.

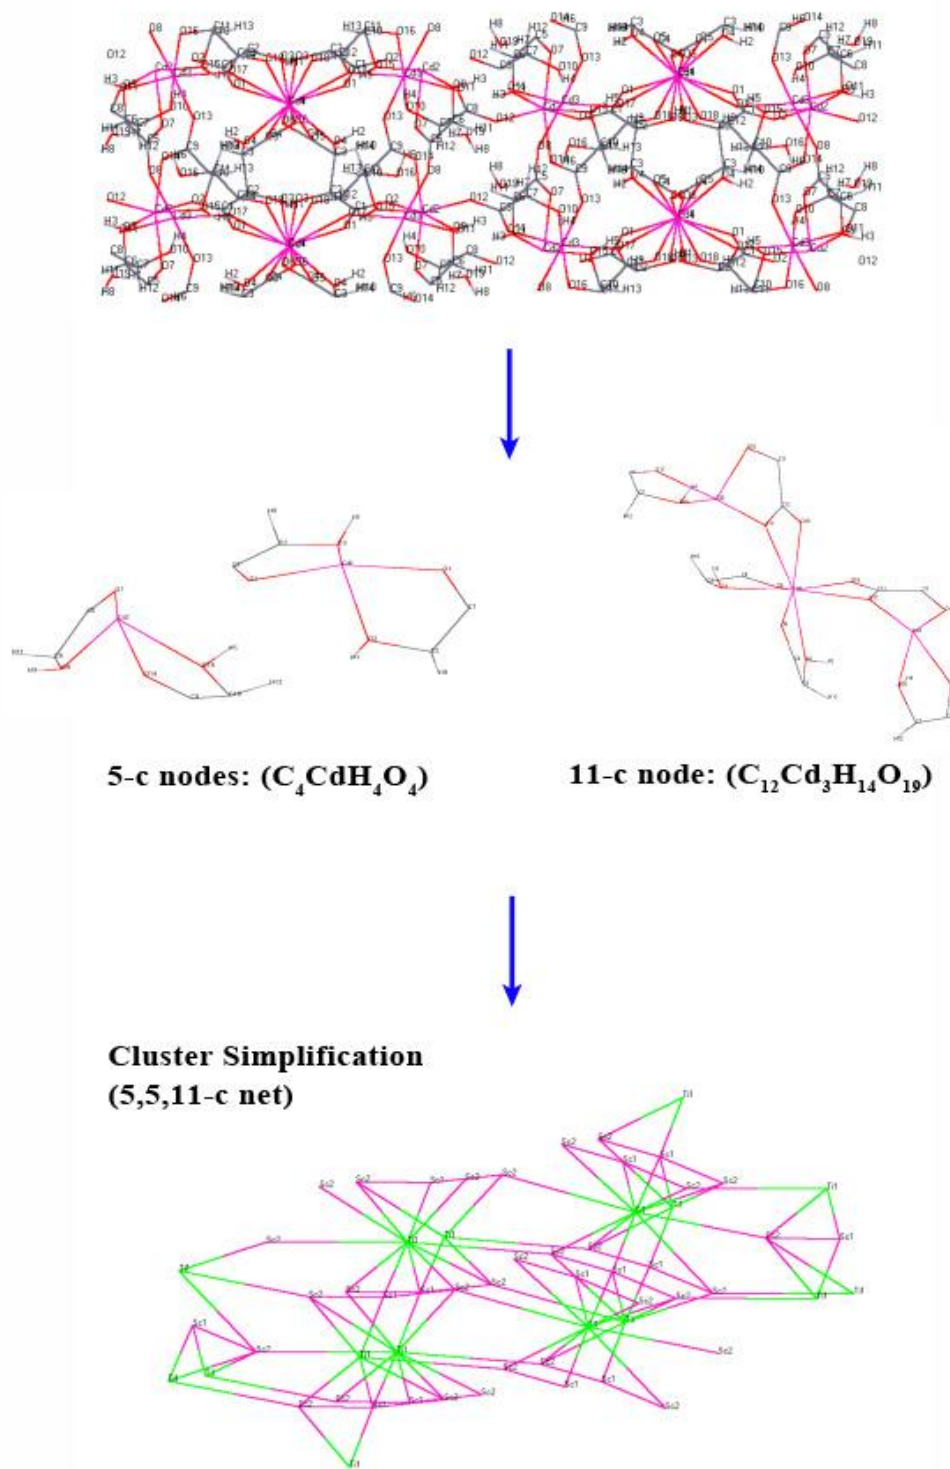

**Figure S6.** Topological Analysis for Compound IV.



**Table S3.** Topologies of reported cadmium tartrates

| Chemical Formula<br><i>CSD Refcode</i><br>[Reference]                                                                                                                                                                                                                       | Topology Demonstration                                                             | Topological simplification | Node selection                                                                                                               | Point Symbol<br>(Schläfli Symbol)                                                  | Nodal Connectivity | Node Type |
|-----------------------------------------------------------------------------------------------------------------------------------------------------------------------------------------------------------------------------------------------------------------------------|------------------------------------------------------------------------------------|----------------------------|------------------------------------------------------------------------------------------------------------------------------|------------------------------------------------------------------------------------|--------------------|-----------|
| $[\text{Cd}(\text{C}_4\text{H}_4\text{O}_6)]_n$<br><i>UPIXUN</i><br>[2a]<br>$\{[\text{Cd}(\text{C}_4\text{H}_4\text{O}_6)] \cdot 0.167\text{H}_2\text{O}\}_n$<br><i>XUBMEN</i><br>[2b]                                                                                      | 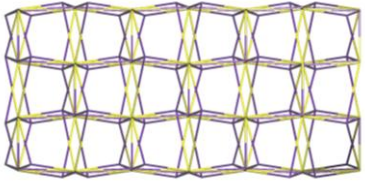  | Cluster Simplification     | 5-c nodes:<br>$(\text{C}_4\text{CdH}_4\text{O}_4)$<br>11-c nodes:<br>$(\text{C}_{12}\text{Cd}_3 \text{H}_{14}\text{O}_{19})$ | $\{3^2.4^6.5^2\}_2$<br>$\{3^4.4^{14}.5^{16}.6^{18}.7^2.8\}$<br>$\{3^4.4^3.5^2.6\}$ | 5,5,11-c           | 3-nodal   |
| $\{[\text{Cd}_2(\mu\text{-C}_4\text{H}_4\text{O}_6)_2(\text{H}_2\text{O})] \cdot 3\text{H}_2\text{O}\}_\infty$<br><i>HIXWIU01</i><br>[23]<br>$\{[\text{Cd}_2(\text{C}_4\text{H}_4\text{O}_6)_2(\text{H}_2\text{O})] \cdot 3\text{H}_2\text{O}\}_n$<br><i>HIXWIU</i><br>[24] |   | Standard simplification    | 3c-nodes:<br>Tart(O1-O6)<br>and Cd1<br>4c-nodes :<br>Tart(O7-O12)<br>and Cd2                                                 | $\{4.8^2\}\{4.8^4.10\}$                                                            | 3,3,4,4-c          | 4-nodal   |
| $[\text{Cd}_2(\text{C}_4\text{H}_4\text{O}_6)_2]_n$<br><i>CCDC 791340</i><br>[25]                                                                                                                                                                                           |  | Standard simplification    | 4c-nodes:<br>Tart, Cd1<br>and Cd2                                                                                            | $\{4.6^2.8^2.10\}$<br>$\{4.6^2.8^3\}\{4.6^3.8^2\}_2$                               | 4,4,4-c            | 3-nodal   |
